# Supplementary material for: Synthesis of a Redox-Active NNP-Type Pincer Ligand and Its Application to Electrocatalytic CO2 Reduction With First-Row Transition Metal Complexes
Source: PubMed Central journal article supplement (PMC6536570; doi:10.3389/fchem.2019.00330), 2019-05-21
Supplement: Data_Sheet_1.pdf [file Data_Sheet_1.pdf]

**Synthesis of a redox-active NNP-type pincer ligand and its application to first-row transition metal complexes for electrocatalytic CO<sub>2</sub> reduction**

Kallol Talukdar, Asala Issa, and Jonah W. Jurss\*

Department of Chemistry and Biochemistry, University of Mississippi, University, MS 38677, USA.

\*jwjurss@olemiss.edu

*-Supporting Information-*

## Table of Contents

|                                                                                                                                                                              |    |
|------------------------------------------------------------------------------------------------------------------------------------------------------------------------------|----|
| NMR spectra of the ligand, <b>L</b> .....                                                                                                                                    | 3  |
| NMR spectra of <b>[FeL<sub>2</sub>](OTf)<sub>2</sub></b> .....                                                                                                               | 4  |
| NMR spectra of <b>[FeL<sub>2</sub>]Br<sub>2</sub></b> .....                                                                                                                  | 6  |
| NMR spectra of <b>[ZnL<sub>2</sub>](OTf)<sub>2</sub></b> .....                                                                                                               | 7  |
| Crystal data and structure refinement for <b>NiL<sub>2</sub><sup>2+</sup></b> .....                                                                                          | 9  |
| Redox potentials of the <b>M(NNP)<sub>2</sub><sup>2+</sup></b> complexes in acetonitrile.....                                                                                | 10 |
| CVs of <b>FeL<sub>2</sub><sup>2+</sup></b> , <b>CoL<sub>2</sub><sup>2+</sup></b> , <b>NiL<sub>2</sub><sup>2+</sup></b> , and <b>ZnL<sub>2</sub><sup>2+</sup></b> in DMF..... | 10 |
| CVs of Co(II) complex at different metal to ligand ratio.....                                                                                                                | 11 |
| Repeated CVs of <b>CoL<sub>2</sub><sup>2+</sup></b> under N <sub>2</sub> atmosphere.....                                                                                     | 11 |
| HR-MS of controlled potential electrolysis solution of <b>CoL<sub>2</sub><sup>2+</sup></b> under N <sub>2</sub> .....                                                        | 12 |
| Scan rate dependence studies of <b>FeL<sub>2</sub><sup>2+</sup></b> , <b>CoL<sub>2</sub><sup>2+</sup></b> , and <b>NiL<sub>2</sub><sup>2+</sup></b> .....                    | 13 |
| Kinetics of <b>CoL<sub>2</sub><sup>2+</sup></b> ( <i>i<sub>cat</sub>/i<sub>p</sub></i> vs potential and TOF vs scan rate).....                                               | 16 |
| CVs of <b>FeL<sub>2</sub><sup>2+</sup></b> , <b>CoL<sub>2</sub><sup>2+</sup></b> , and <b>NiL<sub>2</sub><sup>2+</sup></b> under dry and wet conditions.....                 | 17 |
| Representative Charge vs Time plots of CPEs.....                                                                                                                             | 18 |
| Representative CVs before and after CPE experiment of <b>CoL<sub>2</sub><sup>2+</sup></b> .....                                                                              | 19 |
| CV, Charge vs Time plot, and NMR experiment of <b>ZnL<sub>2</sub><sup>2+</sup></b> .....                                                                                     | 20 |
| Proposed mechanisms for CO <sub>2</sub> and H <sup>+</sup> reduction by <b>CoL<sub>2</sub><sup>2+</sup></b> .....                                                            | 22 |

**L, <sup>1</sup>H NMR (500 MHz, CD<sub>3</sub>CN)**

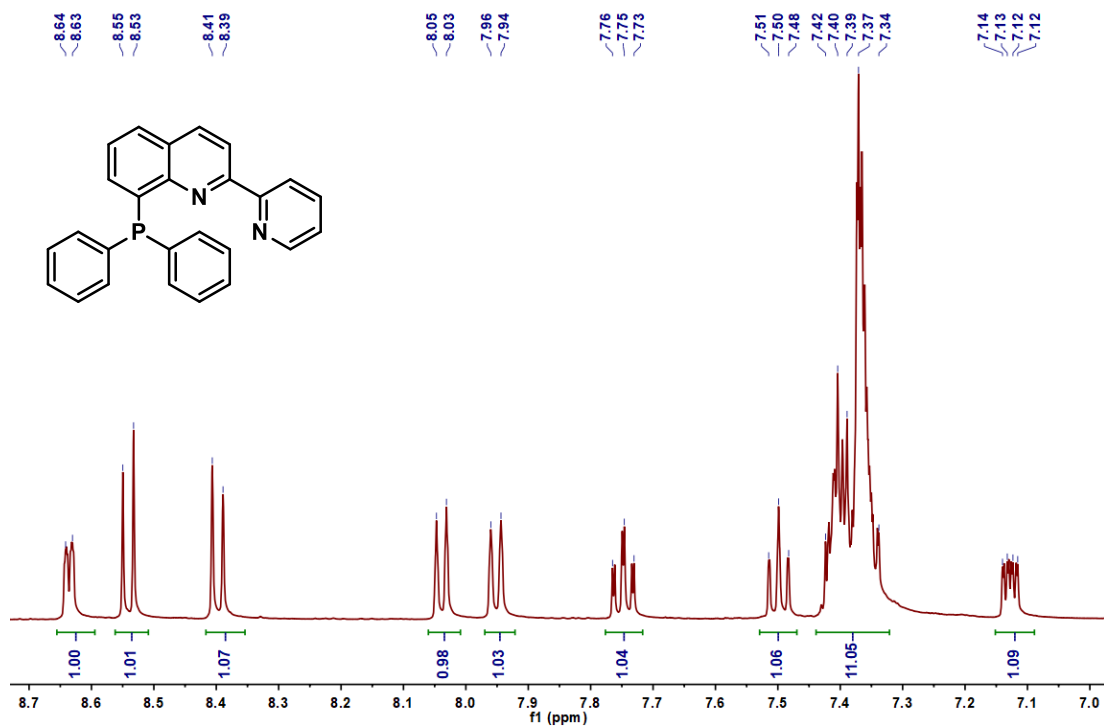

**L, <sup>31</sup>P NMR (167 MHz, CDCl<sub>3</sub>)**

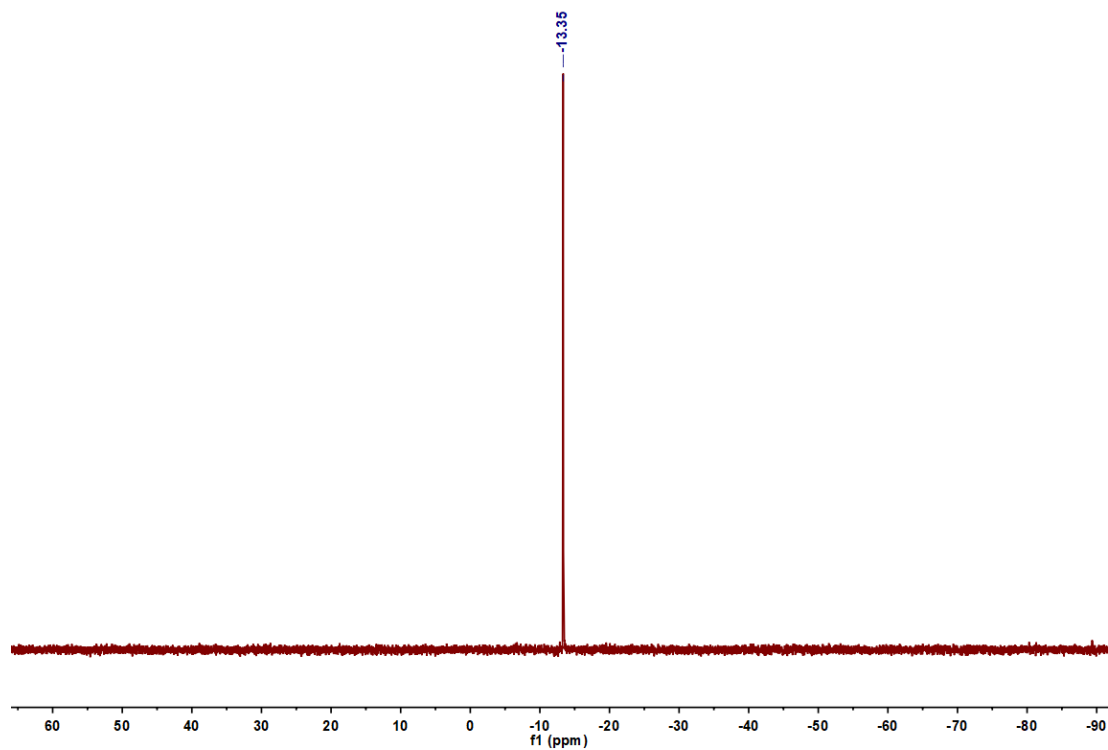

*L*, <sup>13</sup>C NMR (126 MHz, CDCl<sub>3</sub>)

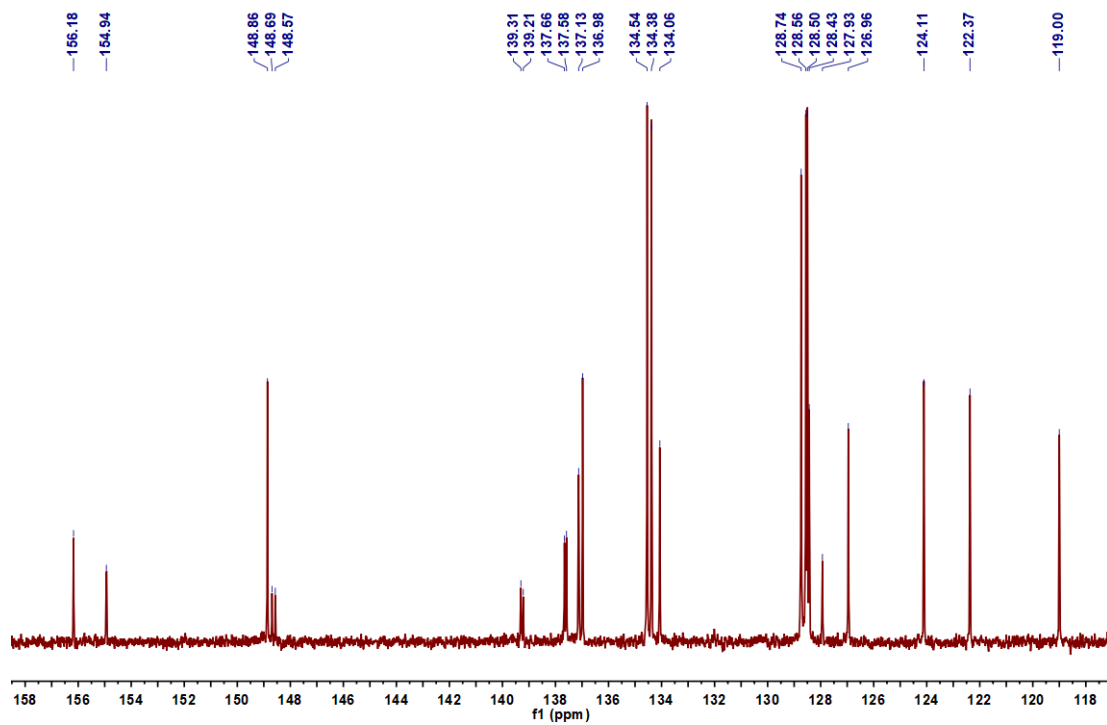

[FeL<sub>2</sub>](OTf)<sub>2</sub>, <sup>1</sup>H NMR (500 MHz, CD<sub>3</sub>CN)

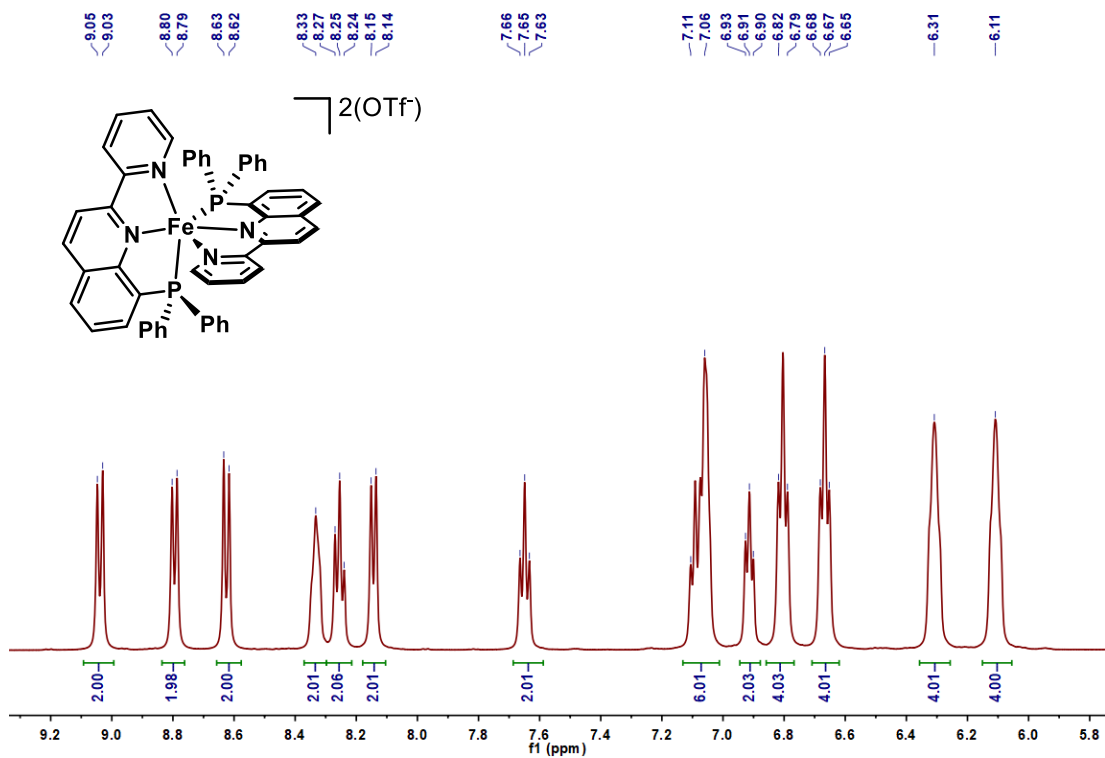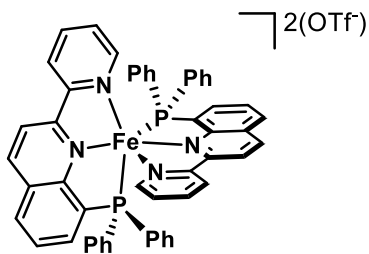

$[FeL_2](OTf)_2$ ,  $^{31}P$  NMR (167 MHz,  $CDCl_3$ )

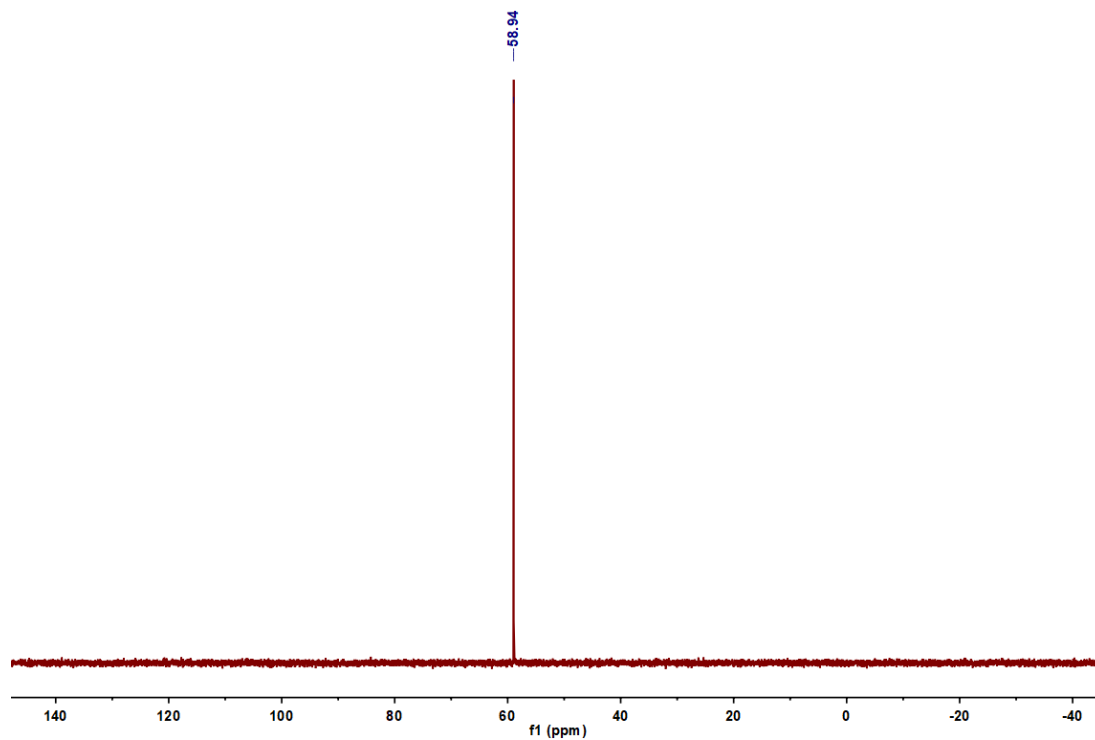

$[FeL_2](OTf)_2$ ,  $^{13}C$  NMR (126 MHz, Acetone- $d_6$ )

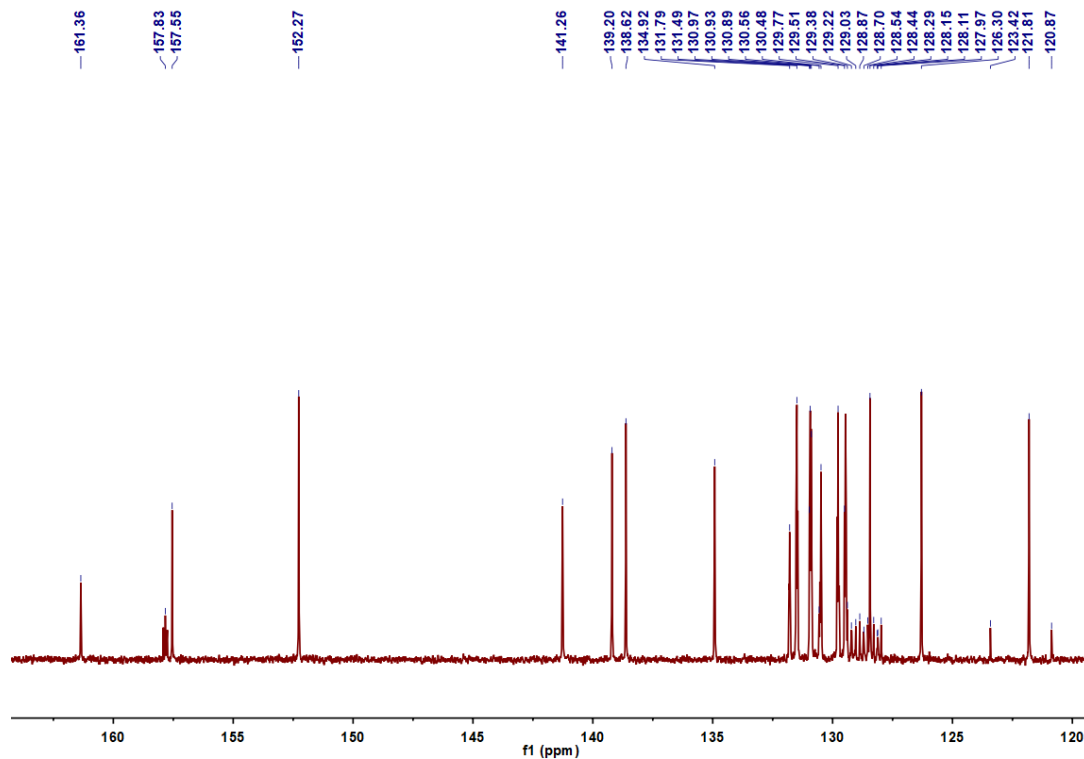

**$[FeL_2]Br_2$ ,  $^1H$  NMR (500 MHz, DMSO- $d_6$ )**

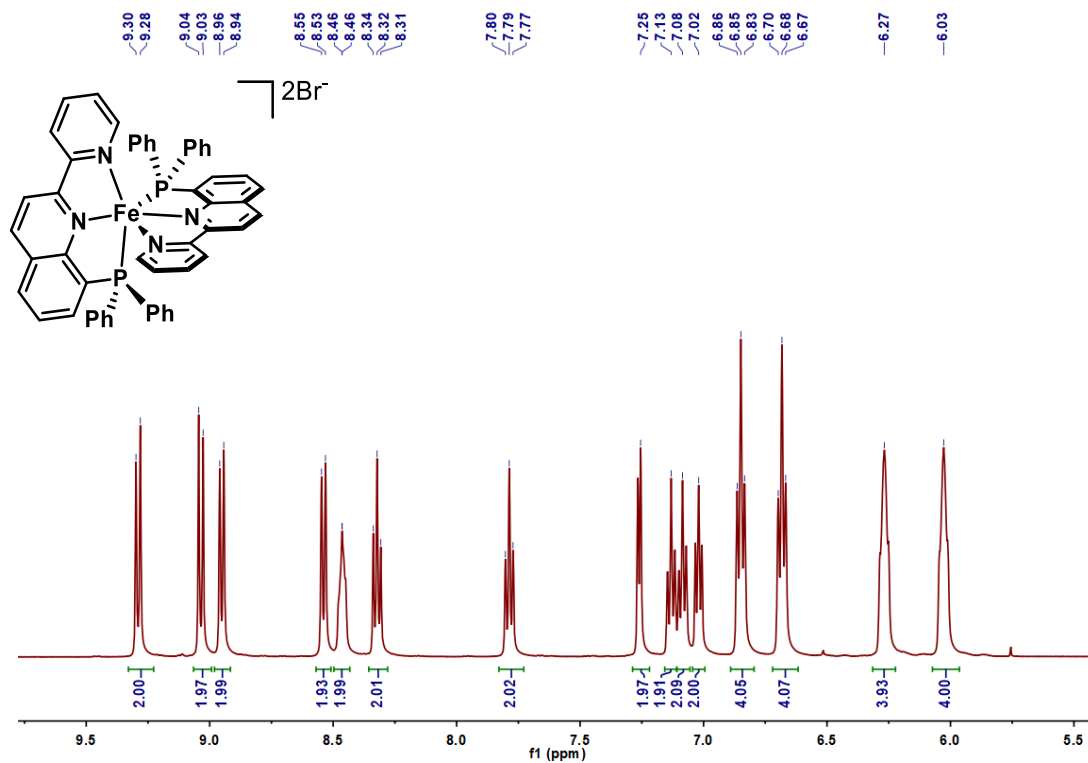

**$[FeL_2]Br_2$ ,  $^{31}P$  NMR (167 MHz, DMSO- $d_6$ )**

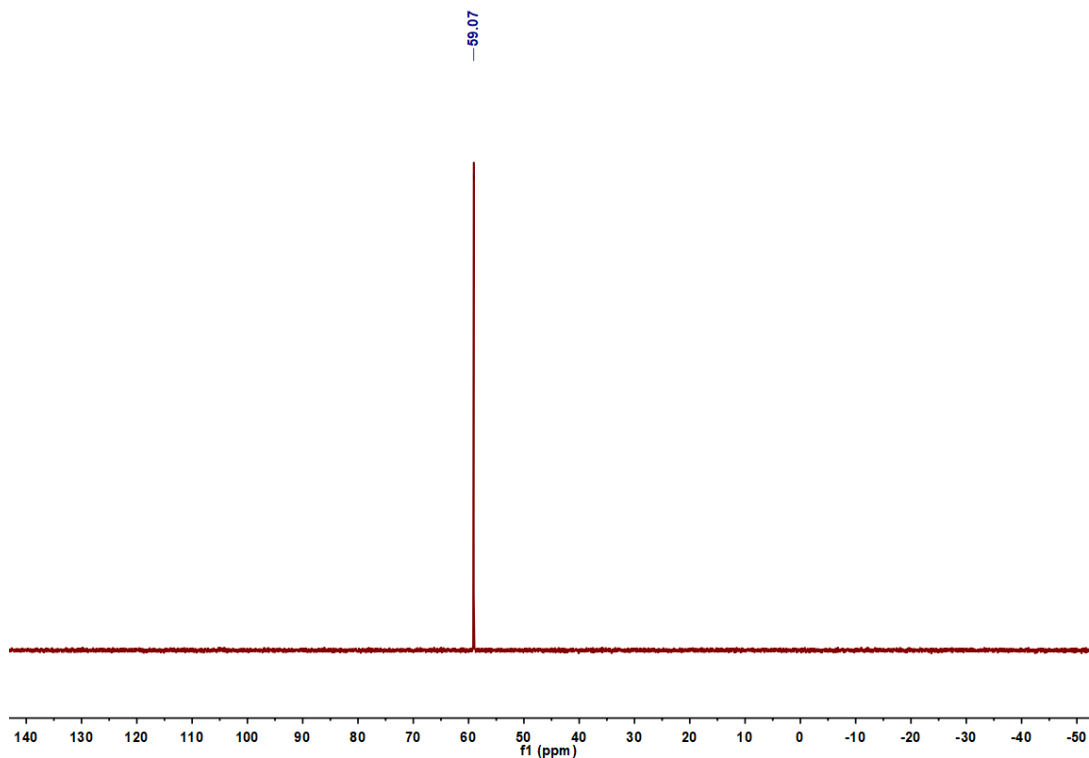

$[FeL_2]Br_2$ ,  $^{13}C$  NMR (126 MHz, DMSO- $d_6$ )

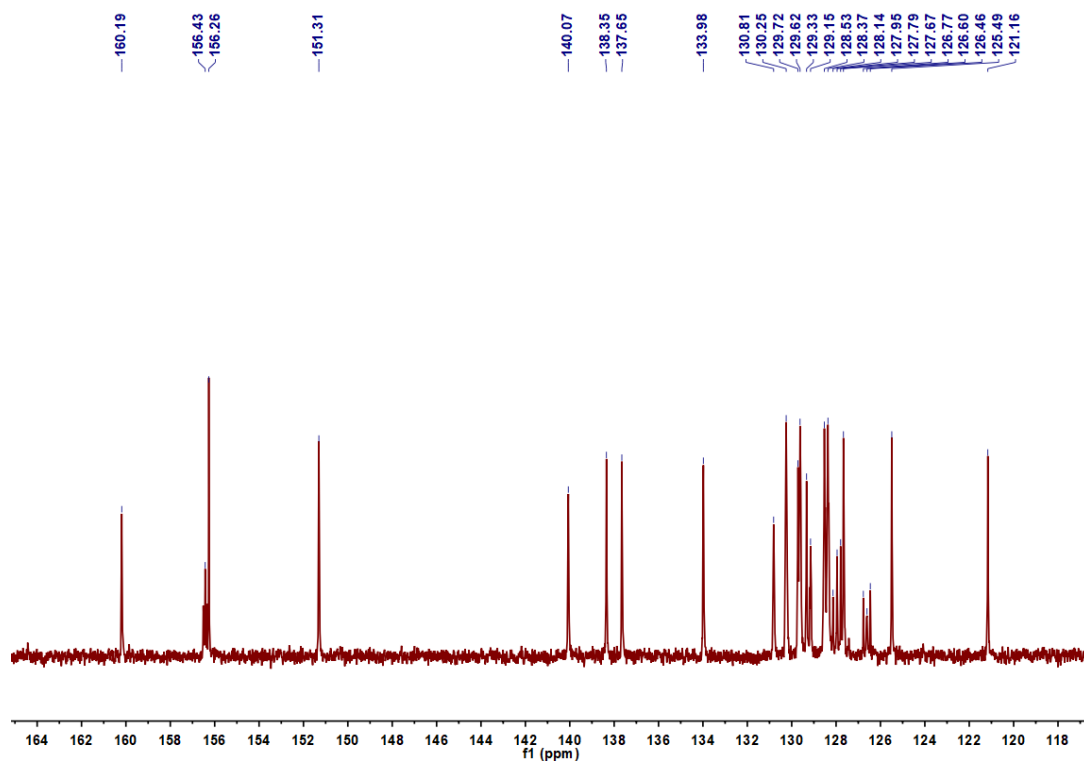

$[ZnL_2](OTf)_2$ ,  $^1H$  NMR (500 MHz,  $CD_3CN$ )

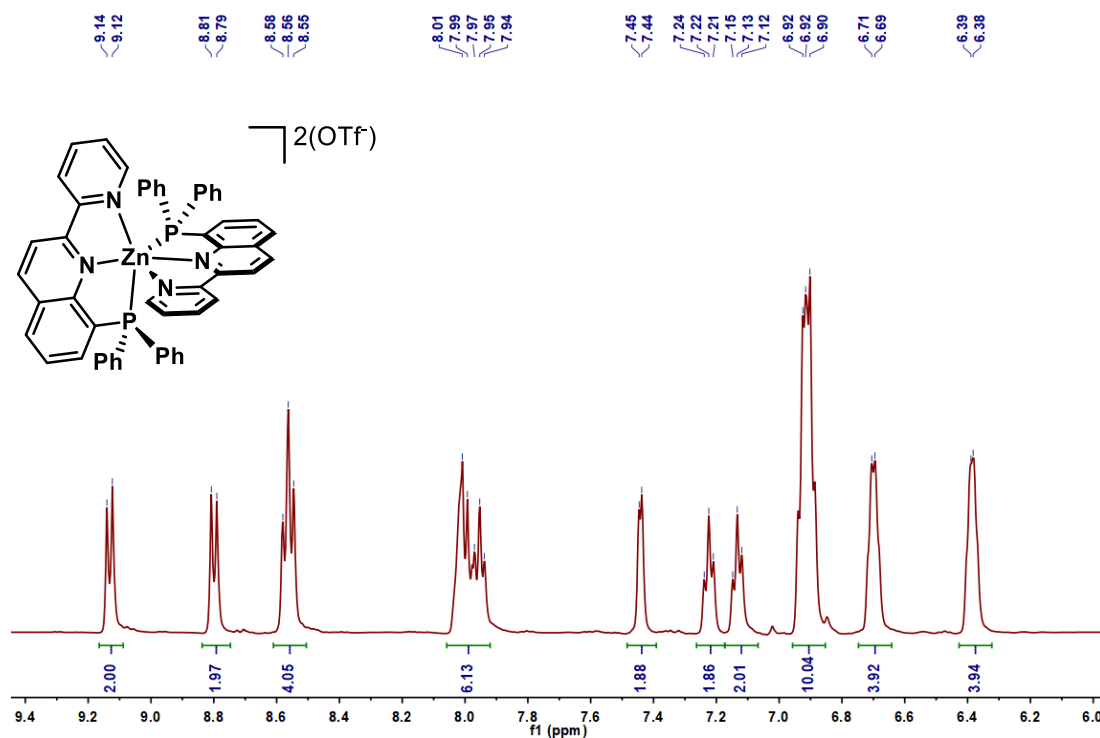

$[ZnL_2](OTf)_2$ ,  $^{31}P$  NMR (167 MHz,  $CDCl_3$ )

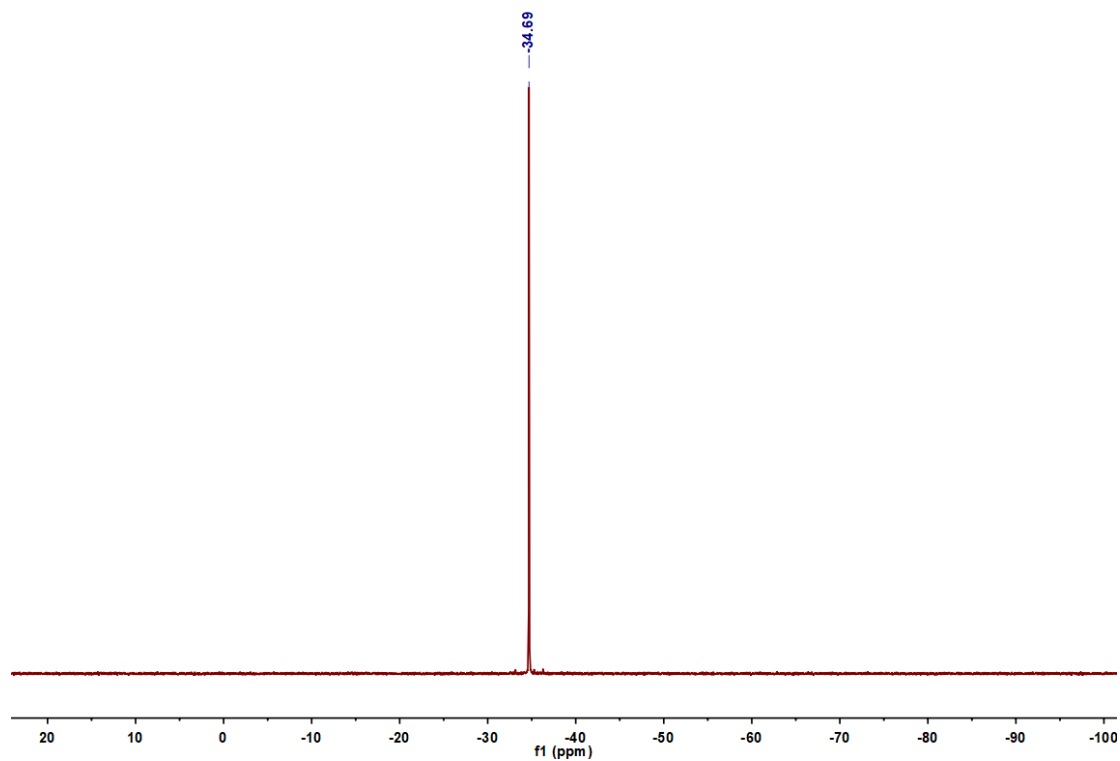

$[ZnL_2](OTf)_2$ ,  $^{13}C$  NMR (126 MHz, Acetone- $d_6$ )

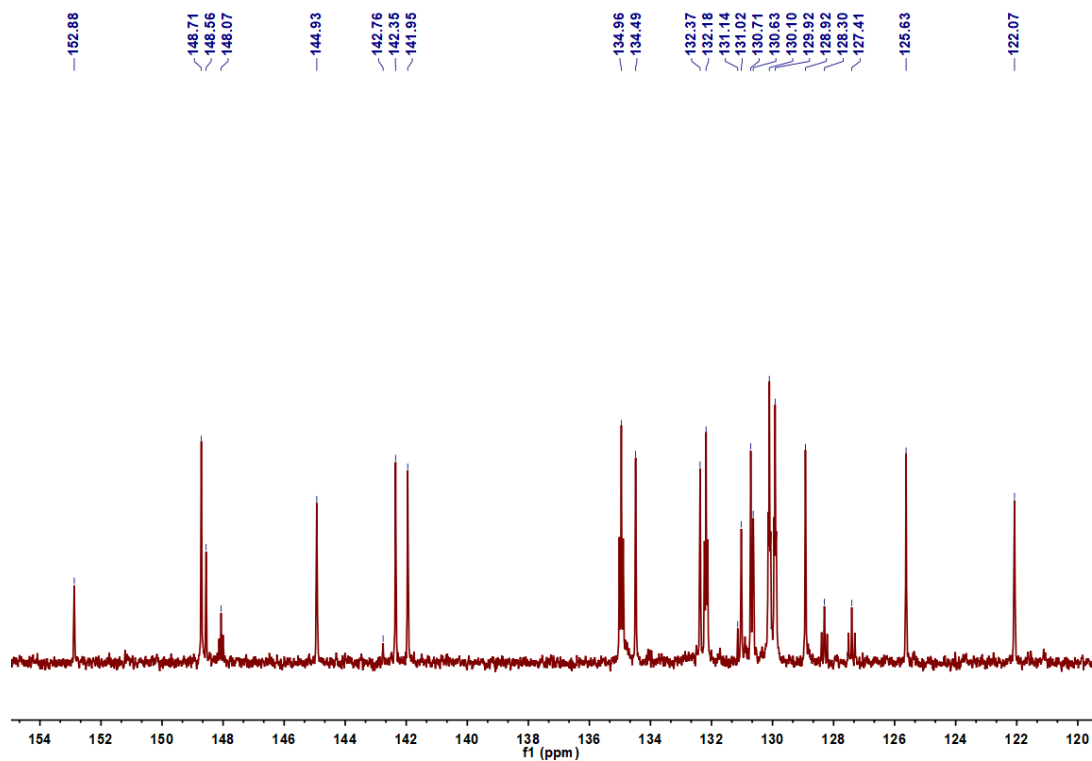



**Table S1.** Crystal data and structure refinement for  $\text{NiL}_2^{2+}$  (CCDC deposition #: 1909986).

|                                   |                                                                                                  |                           |
|-----------------------------------|--------------------------------------------------------------------------------------------------|---------------------------|
| Empirical formula                 | C <sub>54</sub> H <sub>46</sub> Cl <sub>2</sub> N <sub>4</sub> Ni O <sub>10</sub> P <sub>2</sub> |                           |
| Formula weight                    | 1102.50                                                                                          |                           |
| Temperature                       | 200(2) K                                                                                         |                           |
| Wavelength                        | 0.71073 Å                                                                                        |                           |
| Crystal system                    | Monoclinic                                                                                       |                           |
| Space group                       | P2(1)/n                                                                                          |                           |
| Unit cell dimensions              | a = 11.383(3) Å                                                                                  | $\alpha = 90^\circ$       |
|                                   | b = 17.434(5) Å                                                                                  | $\beta = 96.227(5)^\circ$ |
|                                   | c = 25.580(7) Å                                                                                  | $\gamma = 90^\circ$       |
| Volume                            | 5047(2) Å <sup>3</sup>                                                                           |                           |
| Z                                 | 4                                                                                                |                           |
| Density (calculated)              | 1.451 Mg/m <sup>3</sup>                                                                          |                           |
| Absorption coefficient            | 0.618 mm <sup>-1</sup>                                                                           |                           |
| F(000)                            | 2280                                                                                             |                           |
| Crystal size                      | 0.20 x 0.20 x 0.20 mm <sup>3</sup>                                                               |                           |
| Theta range for data collection   | 1.42 to 25.33°.                                                                                  |                           |
| Index ranges                      | -12 ≤ h ≤ 13, -20 ≤ k ≤ 20, -30 ≤ l ≤ 30                                                         |                           |
| Reflections collected             | 34960                                                                                            |                           |
| Independent reflections           | 9131 [R(int) = 0.0356]                                                                           |                           |
| Completeness to theta = 25.00°    | 99.7 %                                                                                           |                           |
| Absorption correction             | None                                                                                             |                           |
| Max. and min. transmission        | 0.8863 and 0.8863                                                                                |                           |
| Refinement method                 | Full-matrix least-squares on F <sup>2</sup>                                                      |                           |
| Data / restraints / parameters    | 9131 / 1 / 662                                                                                   |                           |
| Goodness-of-fit on F <sup>2</sup> | 1.160                                                                                            |                           |
| Final R indices [I > 2σ(I)]       | R1 = 0.0698, wR2 = 0.1723                                                                        |                           |
| R indices (all data)              | R1 = 0.0768, wR2 = 0.1765                                                                        |                           |
| Largest diff. peak and hole       | 1.031 and -0.737 e.Å <sup>-3</sup>                                                               |                           |

## Electrochemical Data

**Table S2.** Redox properties of  $M(\text{NNP})_2^{2+}$  complexes in acetonitrile / 0.1 M  $\text{Bu}_4\text{NPF}_6$  solutions under  $\text{N}_2$ . Scan rate = 100 mV/s, glassy carbon disk working electrode. All potentials are referenced versus the ferrocenium/ferrocene ( $\text{Fc}^{+/0}$ ) couple.

| Complex              | Redox Potentials, $E_{1/2}$ (V vs $\text{Fc}^{+/0}$ ) |       |                    |                    |                    |                    |       |
|----------------------|-------------------------------------------------------|-------|--------------------|--------------------|--------------------|--------------------|-------|
|                      |                                                       |       |                    |                    |                    |                    |       |
| $\text{FeL}_2^{2+}$  | 0.80                                                  | -1.36 | -1.63              | -                  | -2.24              | -                  | -     |
| $\text{CoL}_2^{2+}$  | -                                                     | -0.46 | -1.06              | -1.78              | -2.12              | -                  | -     |
| $\text{NiL}_2^{2+}$  | 0.66                                                  | -1.25 | -1.50              | -1.83 <sup>b</sup> | -2.15 <sup>b</sup> | -2.25 <sup>c</sup> | -     |
| $\text{CuL}_2^{2+a}$ | -0.22                                                 | -0.46 | -0.76 <sup>b</sup> | -1.10 <sup>c</sup> | -1.87 <sup>c</sup> | -2.18              | -2.32 |
| $\text{ZnL}_2^{2+a}$ | -                                                     | -1.36 | -1.54              | -2.16              | -2.35              | -                  | -     |

*a.* Unstable under repeated cycles; *b.* Irreversible ( $E_{p,a}$ ); *c.* Irreversible / quasireversible ( $E_{p,c}$ )

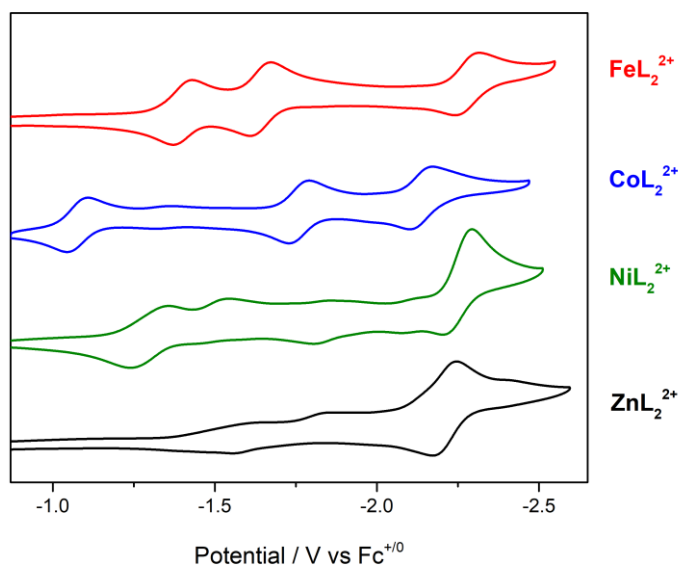

**Fig. S1.** Cyclic voltammograms of  $\text{FeL}_2^{2+}$ ,  $\text{CoL}_2^{2+}$ ,  $\text{NiL}_2^{2+}$ , and  $\text{ZnL}_2^{2+}$  at 0.5 mM concentrations in DMF / 0.1 M  $\text{Bu}_4\text{NPF}_6$  under  $\text{N}_2$ . Scan rate = 100 mV/s; glassy carbon disk working electrode, platinum wire counter electrode, and silver wire quasi-reference electrode.

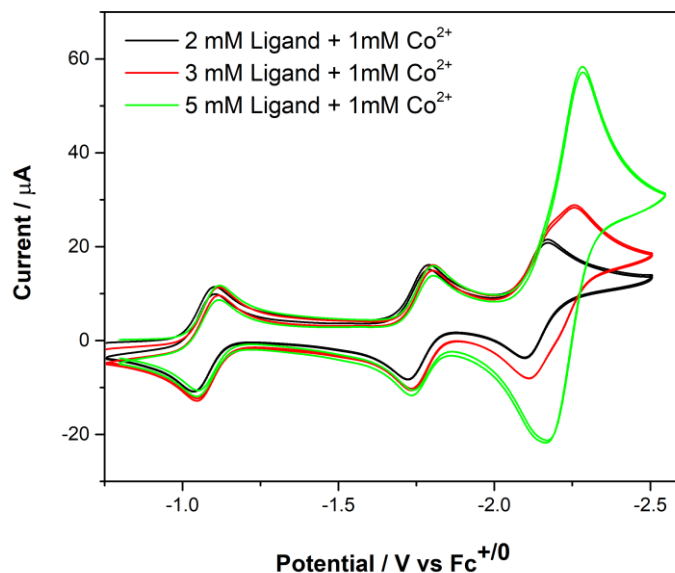

**Fig. S2.** Cyclic voltammograms of  $\text{CoL}_2^{2+}$  prepared *in situ* by adding different amounts of metal precursor and ligand in DMF / 0.1 M  $\text{Bu}_4\text{NPF}_6$  under  $\text{N}_2$ . Scan rate = 100 mV/s; glassy carbon disk working electrode, platinum wire counter electrode, and silver wire quasi-reference electrode.

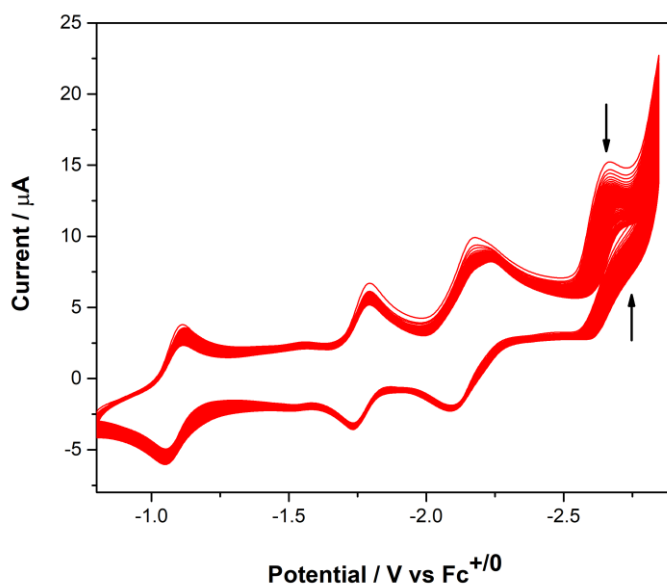

**Fig. S3.** Repeated cyclic voltammograms of  $\text{CoL}_2^{2+}$  under  $\text{N}_2$  atmosphere in DMF / 0.1 M  $\text{Bu}_4\text{NPF}_6$ . Scan rate = 100 mV/s; glassy carbon disk working electrode, platinum wire counter electrode, and silver wire quasi-reference electrode.

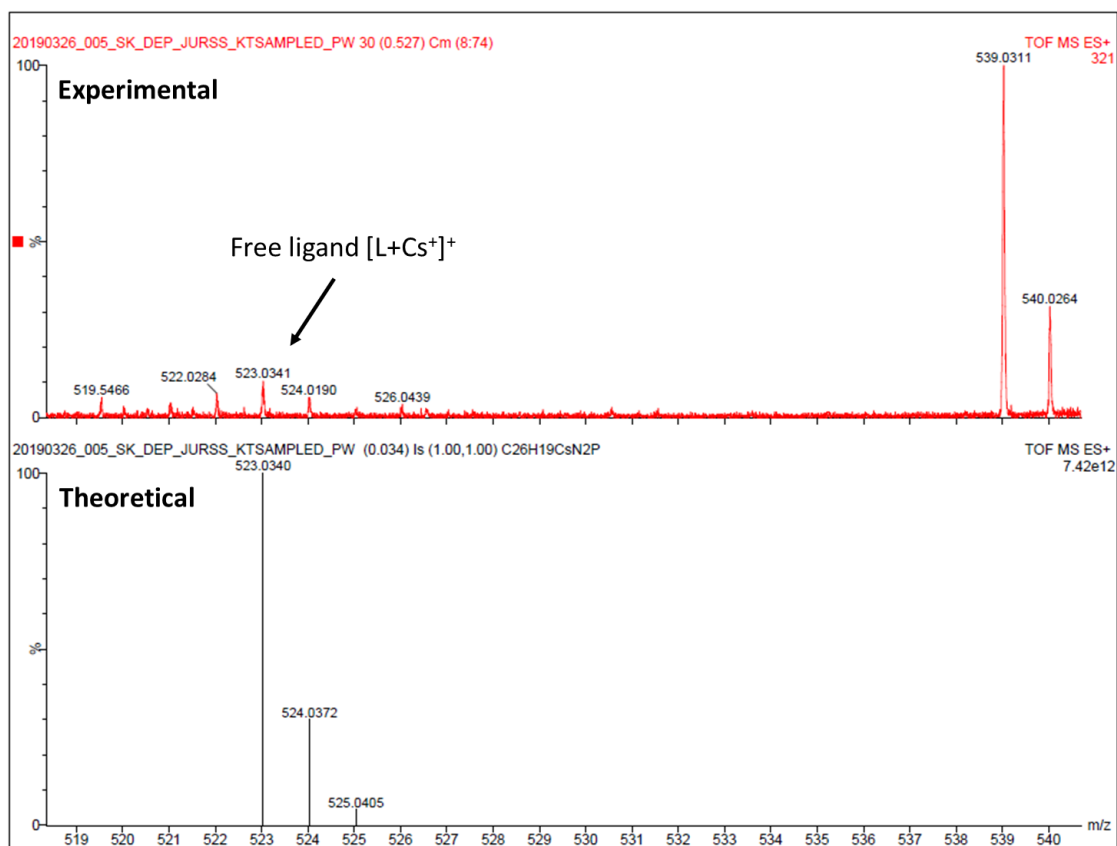

**Fig. S4.** High resolution mass spectrum of 2 mM  $\text{CoL}_2^{2+}$  in  $\text{N}_2$ -saturated DMF / 0.1 M  $\text{Bu}_4\text{NPF}_6$  solution after controlled potential electrolysis at  $E_{\text{appl}} = -2.65$  V. The sample was analyzed after 45 minutes of electrolysis. Glassy carbon rod working electrode, platinum wire counter electrode, and silver wire quasi-reference electrode.

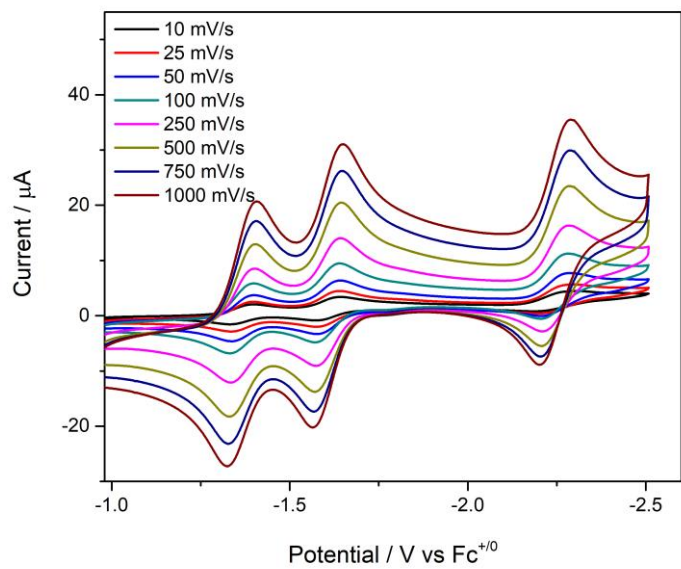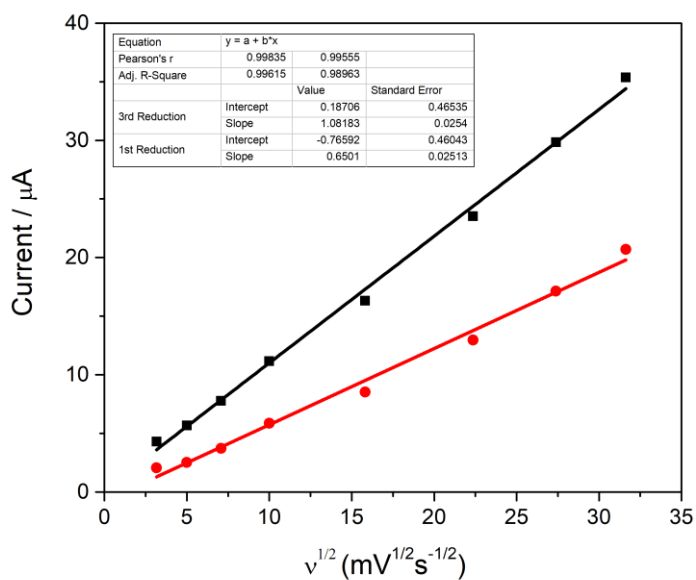

**Fig. S5.** (Top) CVs of 0.5 mM  $\text{FeL}_2^{2+}$  under  $\text{N}_2$  atmosphere at different scan rates in DMF / 0.1 M  $\text{Bu}_4\text{NPF}_6$ . Glassy carbon disk working electrode, platinum wire counter electrode, and silver wire quasi-reference electrode.

(Bottom) Plot of reductive peak currents of the first reduction (red circles) and third reduction (black squares) from cyclic voltammograms versus the square root of the scan rate.

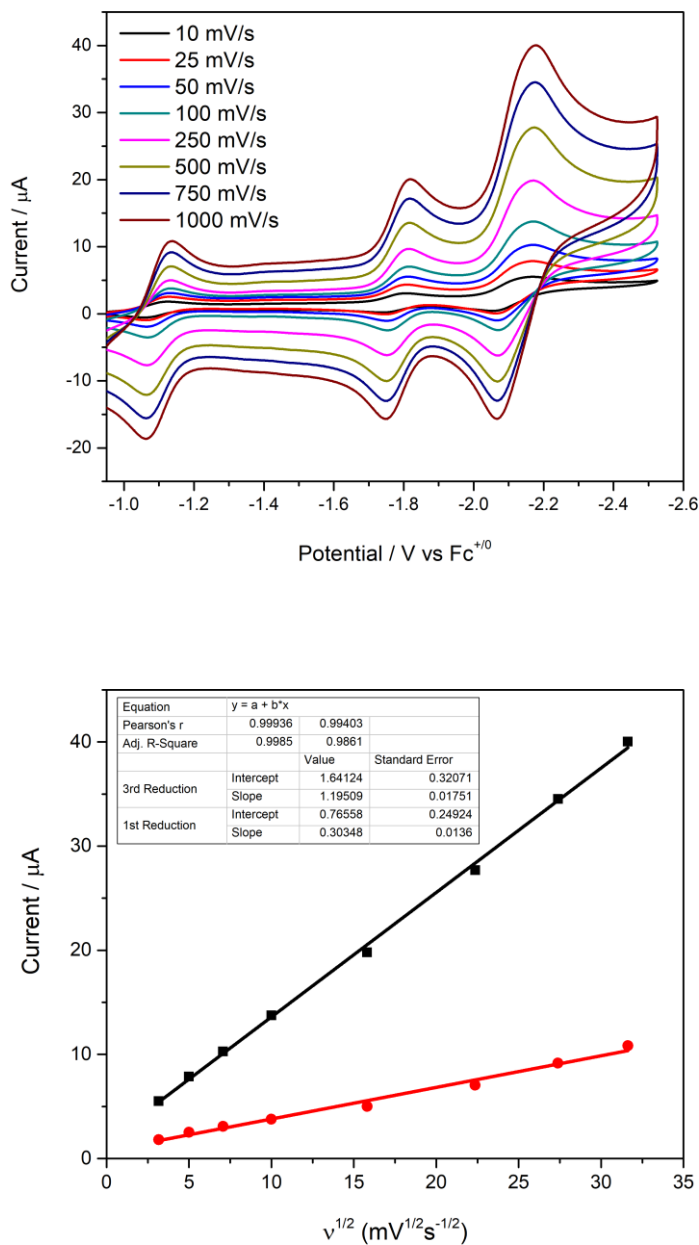

**Fig. S6.** (Top) CVs of 0.5 mM  $\text{CoL}_2^{2+}$  under  $\text{N}_2$  atmosphere at different scan rates in DMF / 0.1 M  $\text{Bu}_4\text{NPF}_6$ . Glassy carbon disk working electrode, platinum wire counter electrode, and silver wire quasi-reference electrode.

(Bottom) Plot of reductive peak currents of the first reduction (red circles) and third reduction (black squares) from cyclic voltammograms versus the square root of the scan rate.

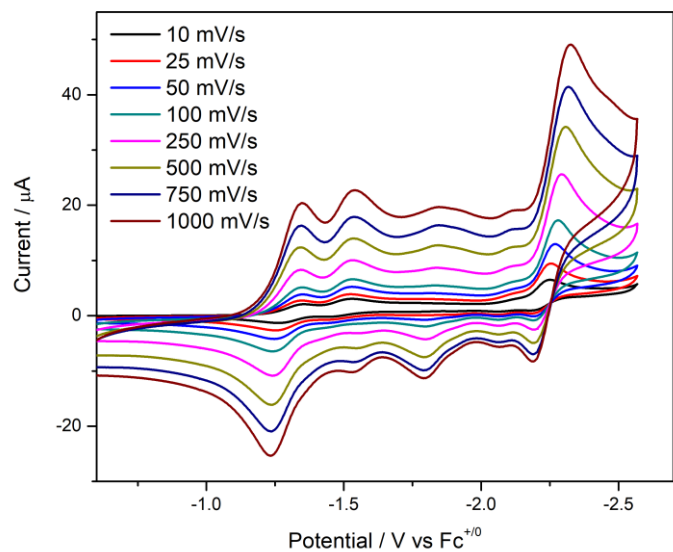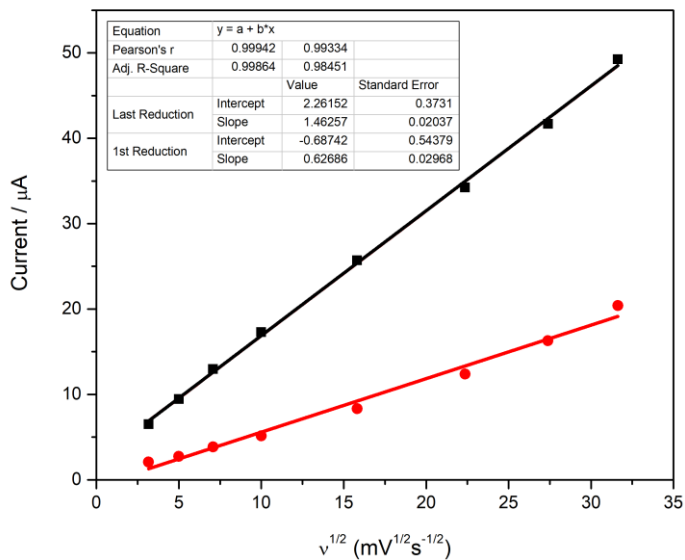

**Fig. S7.** (Top) CVs of 0.5 mM  $\text{NiL}_2^{2+}$  under  $\text{N}_2$  atmosphere at different scan rates in DMF / 0.1 M  $\text{Bu}_4\text{NPF}_6$ . Glassy carbon disk working electrode, platinum wire counter electrode, and silver wire quasi-reference electrode.

(Bottom) Plot of reductive peak currents of the first reduction (red circles) and last reduction (black squares) from cyclic voltammograms versus the square root of the scan rate.

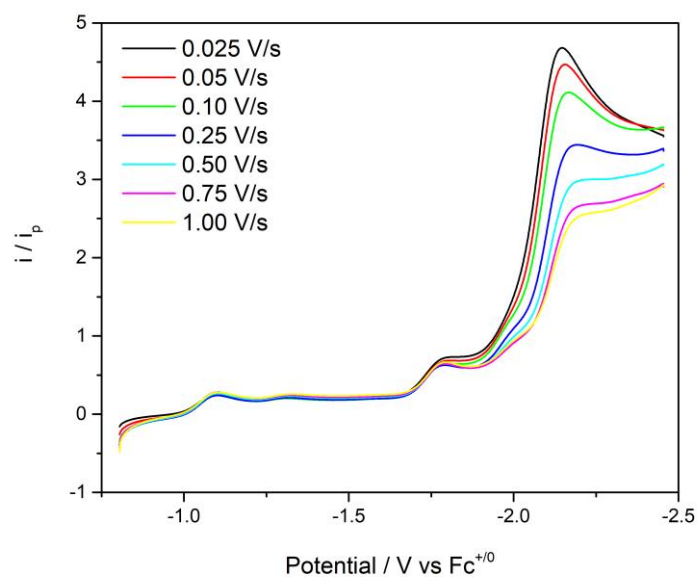

**Fig. S8.** Normalized linear sweep voltammograms ( $i_{cat}/i_p$ ) of 0.5 mM  $\text{CoL}_2^{2+}$  in  $\text{CO}_2$ -saturated DMF / 0.1 M  $\text{Bu}_4\text{NPF}_6$  containing 5%  $\text{H}_2\text{O}$  at different scan rates. Glassy carbon disk working electrode, platinum wire counter, and silver wire quasi-reference electrode.

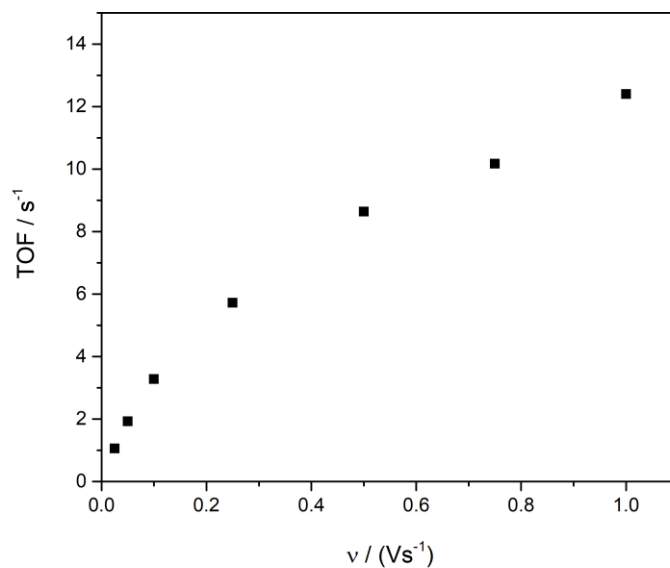

**Fig. S9.** Plot of turnover frequency (TOF) versus scan rate (calculated from **Fig. S8**).



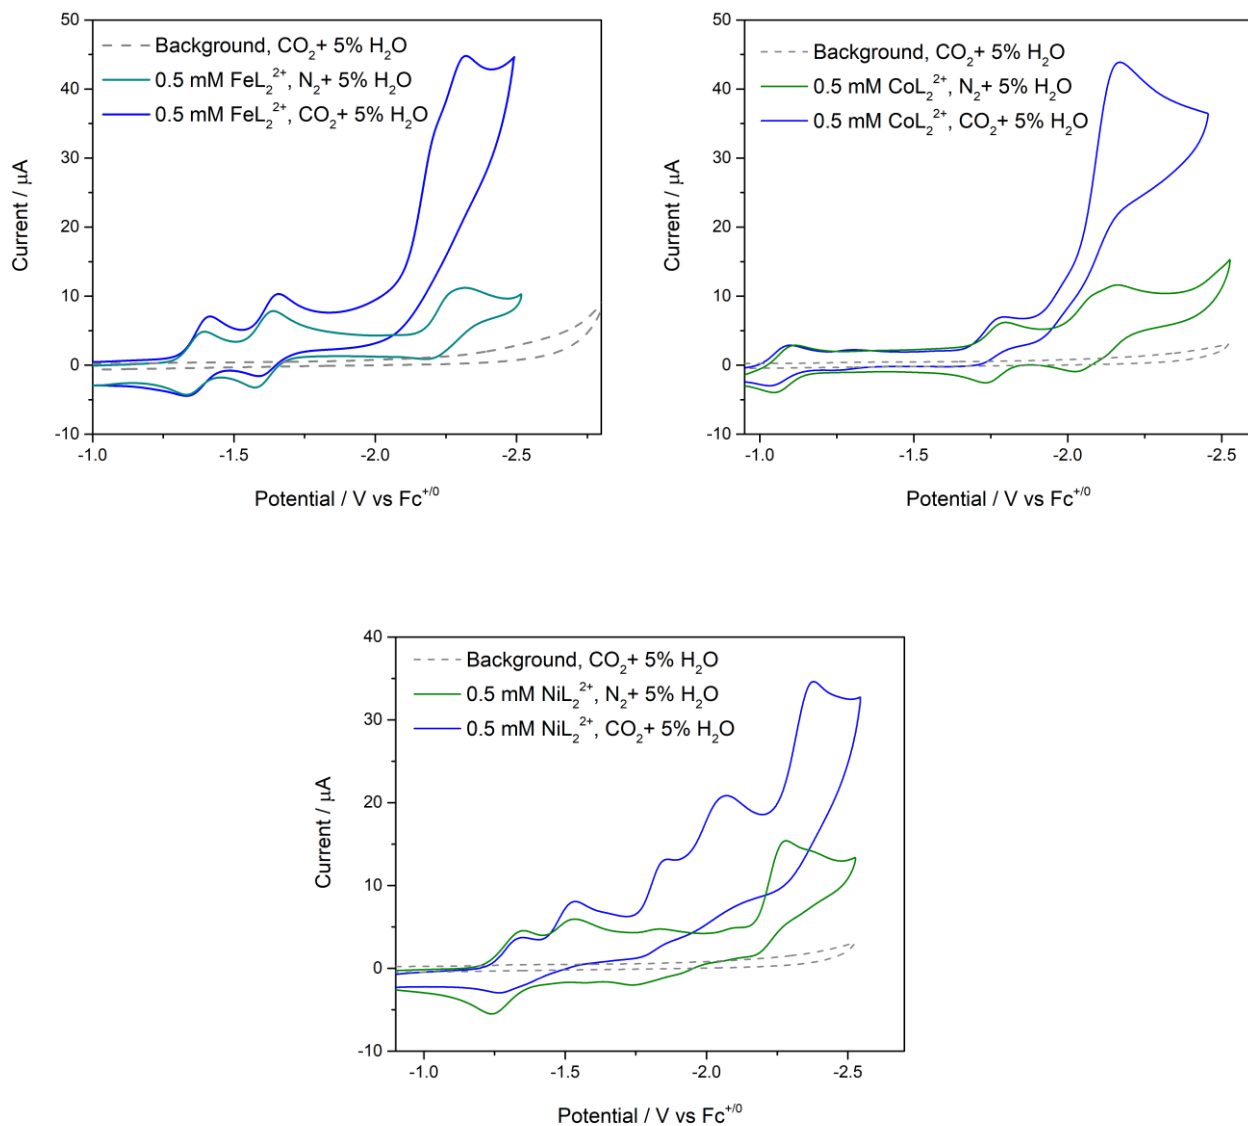

**Fig. S10.** CVs of  $0.5 \text{ mM FeL}_2^{2+}$ ,  $\text{CoL}_2^{2+}$ , and  $\text{NiL}_2^{2+}$  under  $\text{N}_2$  (green line) and  $\text{CO}_2$  atmosphere (blue line) in  $\text{DMF} / 0.1 \text{ M Bu}_4\text{NPF}_6$  containing  $5\% \text{ H}_2\text{O}$ . The background is shown as a dashed line under the same conditions in the absence of metal complex. Scan rate =  $100 \text{ mV/s}$ ; glassy carbon disk working electrode, platinum wire counter electrode, and silver wire quasi-reference electrode.

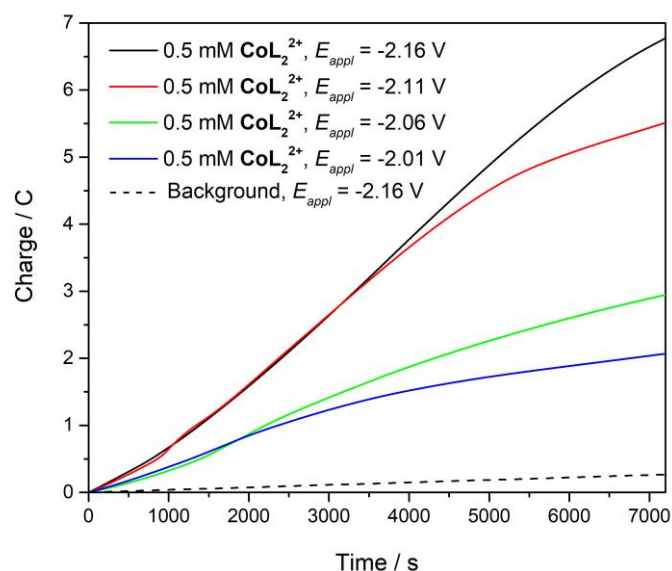

**Fig. S11.** Representative charge versus time plots from controlled potential electrolyses of  $\text{CoL}_2^{2+}$  at different applied potential. 0.5 mM  $\text{CoL}_2^{2+}$  in  $\text{CO}_2$ -saturated DMF/0.1 M  $\text{Bu}_4\text{NPF}_6$  solutions containing 5%  $\text{H}_2\text{O}$ . Background CPE was done in the absence of  $\text{CoL}_2^{2+}$  at  $E_{\text{appl}} = -2.16$  V. Glassy carbon rod working electrode, platinum wire counter electrode, and silver wire quasi-reference electrode.

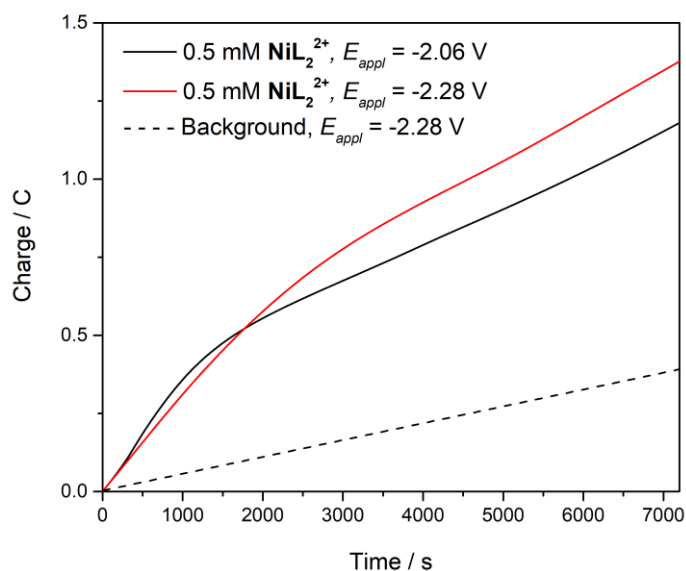

**Fig. S12.** Representative charge versus time plots from controlled potential electrolyses of 0.5 mM  $\text{NiL}_2^{2+}$  at different applied potentials in  $\text{CO}_2$ -saturated DMF / 0.1 M  $\text{Bu}_4\text{NPF}_6$  solutions containing 5%  $\text{H}_2\text{O}$ . Background CPE was done in the absence of  $\text{NiL}_2^{2+}$  at  $E_{\text{appl}} = -2.28$  V. Glassy carbon rod working electrode, platinum wire counter electrode, and silver wire quasi-reference electrode.

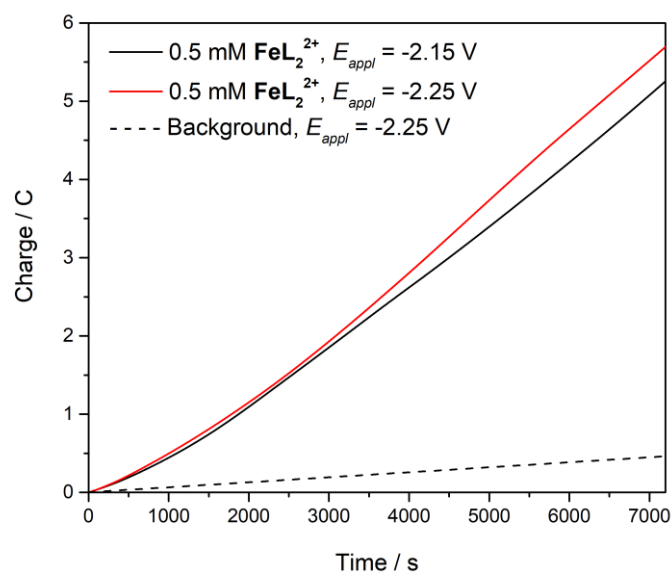

**Fig. S13.** Representative charge versus time plots from controlled potential electrolyses of 0.5 mM  $\text{FeL}_2^{2+}$  at different applied potentials in  $\text{CO}_2$ -saturated DMF / 0.1 M  $\text{Bu}_4\text{NPF}_6$  solutions containing 5%  $\text{H}_2\text{O}$ . Background CPE was done in the absence of  $\text{FeL}_2^{2+}$  at  $E_{\text{appl}} = -2.25$  V. Glassy carbon rod working electrode, platinum wire counter electrode, and silver wire quasi-reference electrode.

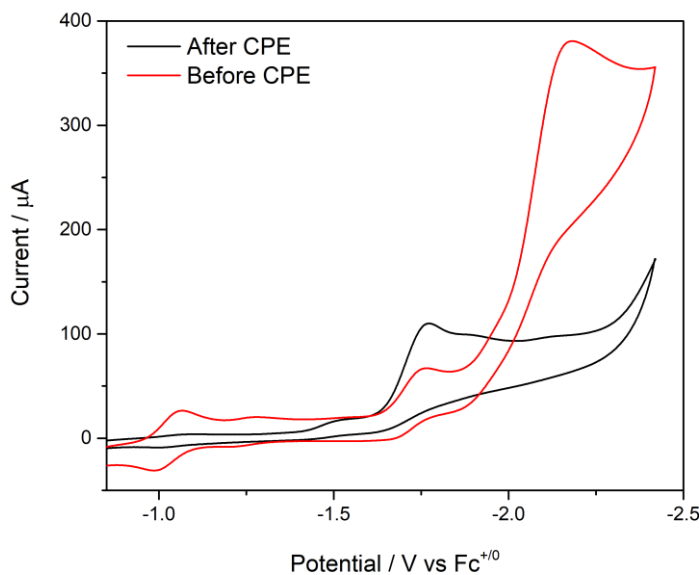

**Fig. S14.** Representative CVs before and after a controlled potential electrolysis (CPE) experiment of 0.5 mM  $\text{CoL}_2^{2+}$  in  $\text{CO}_2$ -saturated DMF / 0.1 M  $\text{Bu}_4\text{NPF}_6$  solution containing 5%  $\text{H}_2\text{O}$ . Glassy carbon rod working electrode, platinum wire counter electrode, and silver wire quasi-reference electrode.

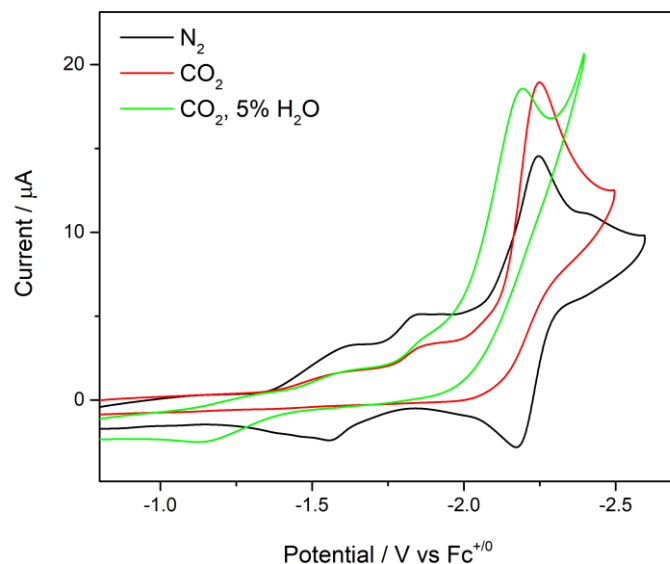

**Fig. S15.** Cyclic voltammograms of  $\text{ZnL}_2^{2+}$  at 0.5 mM concentrations in DMF / 0.1 M  $\text{Bu}_4\text{NPF}_6$  under  $\text{N}_2$  (black),  $\text{CO}_2$  (red) and  $\text{CO}_2$  with 5%  $\text{H}_2\text{O}$  (green). Scan rate = 100 mV/s; glassy carbon disk working electrode, platinum wire counter electrode, and silver wire quasi-reference electrode.

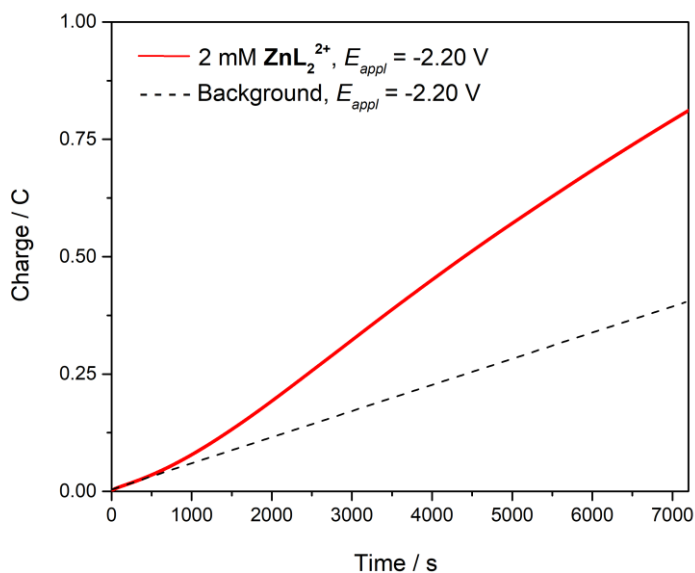

**Fig. S16.** Charge versus time plots from controlled potential electrolyses of 2 mM  $\text{ZnL}_2^{2+}$  at  $E_{\text{appl}} = -2.2$  V in  $\text{CO}_2$ -saturated DMF / 0.1 M  $\text{Bu}_4\text{NPF}_6$  solution containing 5%  $\text{H}_2\text{O}$ . Background CPE was done in the absence of  $\text{ZnL}_2^{2+}$  at  $E_{\text{appl}} = -2.20$  V. Glassy carbon rod working electrode, platinum wire counter electrode, and silver wire quasi-reference electrode.

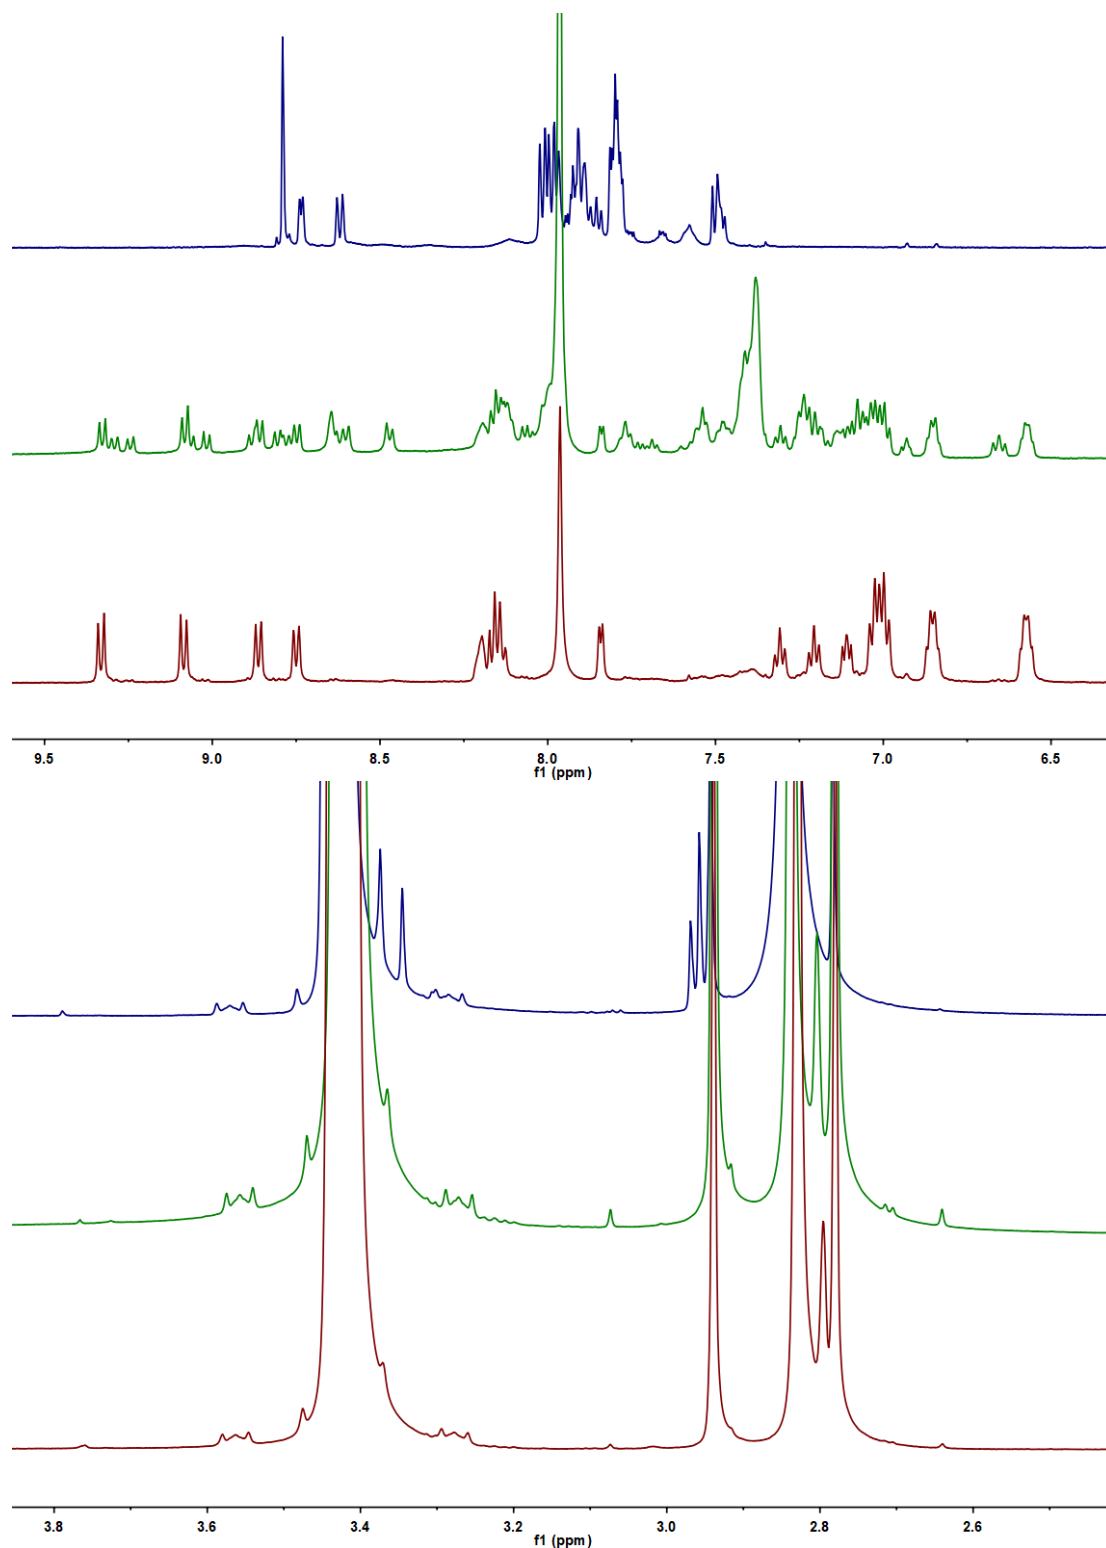

**Fig. S17.**  $^1\text{H}$  NMR spectra (taken in acetone- $d_6$ ) of the electrolysis solution of  $\text{ZnL}_2^{2+}$  before electrolysis (maroon), after electrolysis (green), and after reacting with  $\text{CH}_3\text{I}$  (blue). The CPE was run for 3 hours and then excess  $\text{CH}_3\text{I}$  was added to the solution which was stirred for 1 hour. The solutions were dried under high vacuum before taking the NMRs.

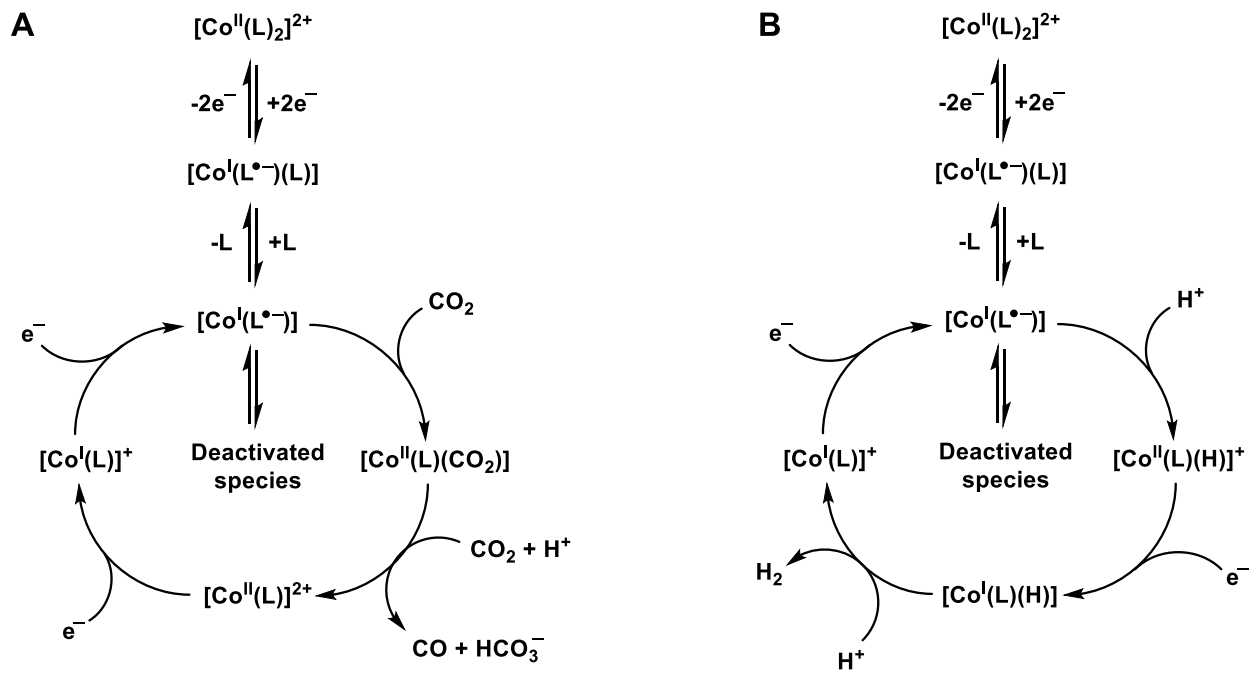

**Fig. S18.** Proposed mechanisms for electrocatalytic  $\text{CO}_2$  reduction (A) and  $\text{H}^+$  reduction (B) by the  $\text{CoL}_2^{2+}$  complex.
